# Supplementary material
Source: PubMed Central journal article supplement (PMC5522967)
Supplement: mol-23-17_023_Kang_Suppl.pdf [file mol-23-17_023_Kang_Suppl.pdf]

Supplemental Data

Mutation Spectrum of *STAR* and the Founder Effect of p.Q258\* in Korean Patients with Congenital Lipoid Adrenal Hyperplasia

Eungu Kang,<sup>1</sup> Yoon-Myung Kim,<sup>1</sup> Gu-Hwan Kim,<sup>2</sup> Beom Hee Lee,<sup>1</sup> Han-Wook Yoo,<sup>1</sup> and Jin-Ho Choi<sup>1</sup>

Online address: <http://www.molmed.org>

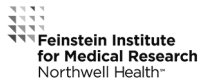

Supplementary Table S1. Karyotype and mutations in the *STAR* gene of 45 patients from 42 families.

| Family number | Patient number | Sex of rearing | Karyotype | STAR gene          |                    |
|---------------|----------------|----------------|-----------|--------------------|--------------------|
|               |                |                |           | Allele 1           | Allele 2           |
| 1             | 1*             | F              | 46,XX     | c.772C>T (p.Q258*) | c.772C>T (p.Q258*) |
| 2             | 2*             | F              | 46,XX     | c.772C>T (p.Q258*) | c.772C>T (p.Q258*) |
| 3             | 3              | F              | 46,XX     | c.772C>T (p.Q258*) | c.772C>T (p.Q258*) |
| 4             | 4              | F              | 46,XX     | c.772C>T (p.Q258*) | c.772C>T (p.Q258*) |
| 5             | 5*             | F              | 46,XX     | c.772C>T (p.Q258*) | c.772C>T (p.Q258*) |
| 6             | 6              | F              | 46,XX     | c.772C>T (p.Q258*) | c.772C>T (p.Q258*) |
| 7             | 7              | F              | 46,XX     | c.772C>T (p.Q258*) | c.772C>T (p.Q258*) |
| 8             | 8              | F              | 46,XX     | c.772C>T (p.Q258*) | c.772C>T (p.Q258*) |
| 9             | 9              | F              | 46,XX     | c.772C>T (p.Q258*) | c.772C>T (p.Q258*) |
| 10            | 10             | F              | 46,XX     | c.772C>T (p.Q258*) | c.772C>T (p.Q258*) |
| 10            | 11             | F              | 46,XX     | c.772C>T (p.Q258*) | c.772C>T (p.Q258*) |
| 11            | 12*            | F              | 46,XX     | c.772C>T (p.Q258*) | c.772C>T (p.Q258*) |
| 12            | 13*            | F              | 46,XY     | c.772C>T (p.Q258*) | c.772C>T (p.Q258*) |
| 13            | 14             | F              | 46,XY     | c.772C>T (p.Q258*) | c.772C>T (p.Q258*) |
| 14            | 15             | F              | 46,XY     | c.772C>T (p.Q258*) | c.772C>T (p.Q258*) |
| 15            | 16             | F              | 46,XY     | c.772C>T (p.Q258*) | c.772C>T (p.Q258*) |
| 16            | 17             | F              | 46,XY     | c.772C>T (p.Q258*) | c.772C>T (p.Q258*) |
| 16            | 18             | F              | 46,XY     | c.772C>T (p.Q258*) | c.772C>T (p.Q258*) |
| 17            | 19             | F              | 46,XY     | c.772C>T (p.Q258*) | c.772C>T (p.Q258*) |
| 18            | 20             | F              | 46,XY     | c.772C>T (p.Q258*) | c.772C>T (p.Q258*) |
| 19            | 21             | F              | 46,XY     | c.772C>T (p.Q258*) | c.772C>T (p.Q258*) |
| 20            | 22             | F              | 46,XY     | c.772C>T (p.Q258*) | c.772C>T (p.Q258*) |
| 21            | 23             | F              | 46,XY     | c.772C>T (p.Q258*) | c.772C>T (p.Q258*) |
| 22            | 24             | F              | 46,XY     | c.772C>T (p.Q258*) | c.772C>T (p.Q258*) |
| 23            | 25             | F              | 46,XY     | c.772C>T (p.Q258*) | c.545G>A (p.R182H) |
| 24            | 26             | F              | 46,XY     | c.772C>T (p.Q258*) | c.653C>T           |
| 25            | 27             | F              | 46,XY     | c.745-6_810del     | c.653C>T           |
| 26            | 28             | F              | 46,XY     | c.772C>T (p.Q258*) | c.772C>T (p.Q258*) |
| 27            | 29*            | F              | 46,XX     | c.772C>T (p.Q258*) | c.559G>A (p.V187M) |
| 28            | 30             | F              | 46,XY     | c.772C>T (p.Q258*) | c.772C>T (p.Q258*) |
| 29            | 31             | F              | 46,XX     | c.772C>T (p.Q258*) | c.772C>T (p.Q258*) |

Continued on next page

Supplementary Table S1. *Continued.*

| Family number | Patient number   | Sex of rearing | Karyotype | STAR gene          |                         |
|---------------|------------------|----------------|-----------|--------------------|-------------------------|
|               |                  |                |           | Allele 1           | Allele 2                |
| 30            | 32               | F              | 46,XX     | c.772C>T (p.Q258*) | c.772C>T (p.Q258*)      |
| 31            | 33               | F              | 46,XY     | c.772C>T (p.Q258*) | c.772C>T (p.Q258*)      |
| 32            | 34*              | M              | 46,XY     | c.772C>T (p.Q258*) | c.815G>A (p.R272H)      |
| 33            | 35*              | F              | 46,XY     | c.772C>T (p.Q258*) | c.772C>T (p.Q258*)      |
| 34            | 36               | F              | 46,XX     | c.772C>T (p.Q258*) | c.772C>T (p.Q258*)      |
| 35            | 37* <sup>+</sup> | F              | 46,XX     | c.772C>T (p.Q258*) | c.815G>A (p.R272H)      |
| 36            | 38               | F              | 46,XY     | c.772C>T (p.Q258*) | c.772C>T (p.Q258*)      |
| 37            | 39               | F              | 46,XX     | c.772C>T (p.Q258*) | c.543C>T (p.R182C)      |
| 37            | 40               | F              | 46,XX     | c.772C>T (p.Q258*) | c.543C>T (p.R182C)      |
| 38            | 41               | F              | 46,XX     | c.772C>T (p.Q258*) | c.772C>T (p.Q258*)      |
| 39            | 42               | F              | 46,XX     | c.772C>T (p.Q258*) | c.772C>T (p.Q258*)      |
| 40            | 43* <sup>+</sup> | F              | 46,XX     | c.772C>T (p.Q258*) | c.559G>A (p.V187M)      |
| 41            | 44*              | F              | 46,XY     | c.772C>T (p.Q258*) | c.772C>T (p.Q258*)      |
| 42            | 45*              | F              | 46,XX     | c.772C>T (p.Q258*) | c.407del (p.E136Gfs*50) |

\*, indicates the patients who were included in this study; <sup>+</sup>, indicates nonclassical late onset CLAH patients

**Supplementary Table S2.** Haplotype analysis of individuals with mutations in the *STAR* gene.

| Physical position on chromosome 8 (hg19) |            | Patient 1 | Patient 2 | Patient 3 | Patient 4 | Patient 5 | Patient 6 | Patient 7 | Patient 8 | Patient 9 | Patient 10 |
|------------------------------------------|------------|-----------|-----------|-----------|-----------|-----------|-----------|-----------|-----------|-----------|------------|
| 8                                        | rs6986132  | CC         |
| 8                                        | rs802170   | TT        | AT        | TT         |
| 8                                        | rs1892818  | GG         |
| 8                                        | rs4998     | CC        | GC        | GC         |
| 8                                        | rs4994     | CC        | TC        | TC         |
| 8                                        | rs2298423  | CC        | AC        | AC         |
| 8                                        | rs73674110 | AA         |
| 8                                        | rs2186458  | GG        | TG        | GG         |
| 8                                        | rs58656606 | AA        | CA        | CA         |
| 8                                        | rs6605630  | GG        | AG        | AG         |
| 8                                        | rs73674118 | GG         |
| 8                                        | rs59709543 | GG        | AG        | AG         |
| 8                                        | rs28813686 | CC         |
| 8                                        | rs28797500 | CC         |
| 8                                        | rs3813521  | CC         |
| 8                                        | rs28368989 | TT         |
| 8                                        | rs28377666 | GG         |
| 8                                        | rs6605631  | AA         |
| 8                                        | rs28570677 | GG        | TG        | TG         |
| 8                                        | rs7816482  | TT         |
| 8                                        | rs78758900 | GG         |
| 8                                        | rs28877647 | GG         |
| 8                                        | rs2073351  | GG        | AG        | AG         |
| 8                                        | rs2843743  | GG        | AG        | AG         |
| 8                                        | rs2517388  | TT        | GT        | GT         |
| 8                                        | rs2720044  | AA         |
| 8                                        | rs2843740  | GG        | AG        | AG         |
| 8                                        | rs2517397  | TT        | TT        | TT        | TT        | CT        | TT        | TT        | TT        | TT        | TT         |
| 8                                        | rs63215562 | TT        | CT        | CT         |
| 8                                        | rs28361934 | TT         |
| 8                                        | rs35045158 | CC         |
| 8                                        | rs34575008 | AA         |
| 8                                        | rs16887217 | TT         |
| 8                                        | rs2720049  | GG         |
| 8                                        | rs7819423  | AA         |
| 8                                        | rs72552290 | CC         |
| 8                                        | rs6474491  | TT         |

\*Shared haplotype of each patient from paternal or maternal alleles are marked by gray color.

The father of patient 5, the mother of patient 9, and the mother of patient 10 are carriers of the p.V187M, p.R272H, and p.E136Gfs\*50, respectively. The other parents are carriers of p.G258\*.
